# Supplementary material
Source: PubMed Central journal article supplement (PMC3529388)
Supplement: supp_en.2012-1725_EN-12-1725.pdf [file supp_en.2012-1725_EN-12-1725.pdf]

## Supplemental Table

|                             | Treatment Group      |                     |
|-----------------------------|----------------------|---------------------|
|                             | Control ASO<br>(n=6) | ChREBP ASO<br>(n=6) |
| <b>Steatosis</b>            |                      |                     |
| 0                           | 3                    | 2                   |
| 1                           | 2                    | 4                   |
| 2                           | 1                    | 0                   |
| 2                           | 0                    | 0                   |
| <b>Portal Inflammation</b>  |                      |                     |
| 0                           | 1                    | 2                   |
| 1                           | 5                    | 4                   |
| <b>Lobular Inflammation</b> |                      |                     |
| 0                           | 4                    | 5                   |
| 1                           | 2                    | 1                   |
| <b>Lipogranuloma</b>        |                      |                     |
| 0                           | 5                    | 4                   |
| 1                           | 1                    | 2                   |
| <b>Microgranuloma</b>       |                      |                     |
| 0                           | 5                    | 5                   |
| 1                           | 1                    | 1                   |
| <b>Ballooning</b>           |                      |                     |
| 0                           | 4                    | 4                   |
| 1                           | 2                    | 2                   |
| 2                           | 0                    | 0                   |
| <b>NAS Score</b>            |                      |                     |
| 0                           | 2                    | 1                   |
| 1                           | 1                    | 3                   |
| 2                           | 2                    | 2                   |
| 3                           | 1                    | 0                   |
| <b>Fibrosis</b>             |                      |                     |
| 0                           | 6                    | 5                   |
| 1                           | 0                    | 1                   |
| 2                           | 0                    | 0                   |

# Control ASO

# ChRBEP ASO

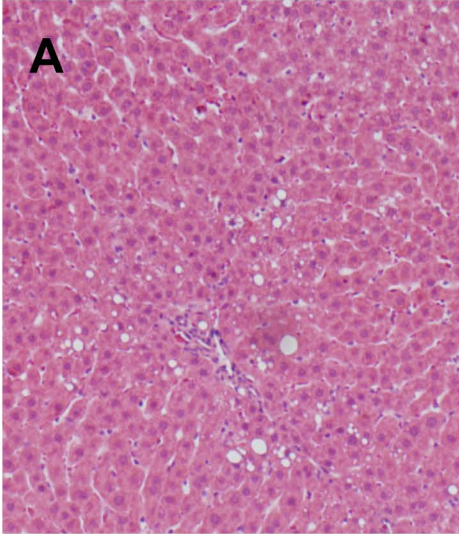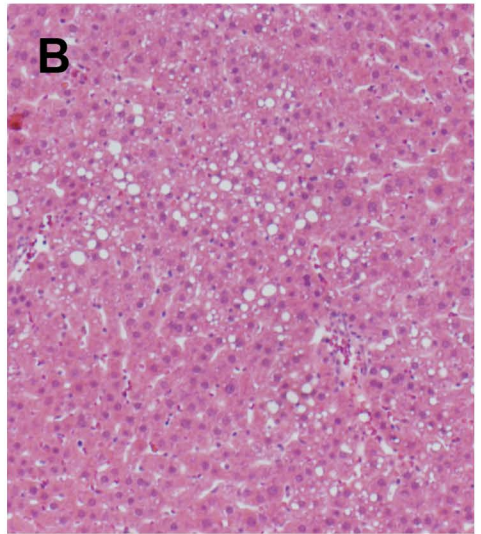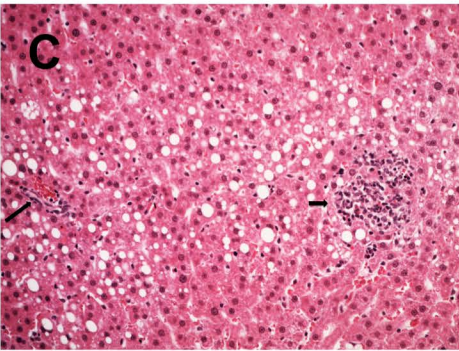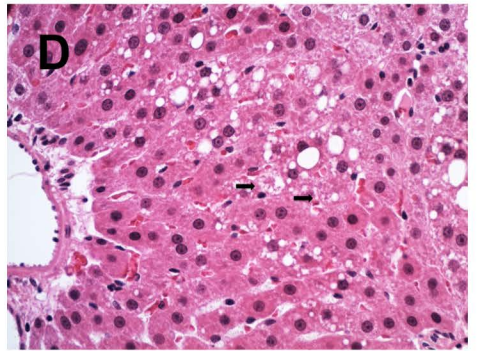

Representative photomicrographs of H&E sections of liver from fructose-fed rats treated with a Control ASO (right) or ChREBP ASO (left). Periportal steatosis was evident in both groups, as shown in Panels A&B. Panel C shows an area of periportal steatosis (long arrow indicated portal track) and microgranuloma (short arrow). Panel D demonstrates the presence of ballooning degeneration (short arrows).
